# Supplementary material
Source: publisher site journal article supplement (https://www.dovepress.com/article/620994)
Supplement: Supplementary file 1 [file 620994%20Supplementary%20File%201.docx]

**Supplementary File 1.** PRISMA-ScR Checklist

| **SECTION** | **ITEM** | **PRISMA-ScR CHECKLIST ITEM** | **REPORTED ON PAGE #** |
| --- | --- | --- | --- |
| **TITLE** | | | |
| Title | 1 | Identify the report as a scoping review. | Page 1 |
| **ABSTRACT** | | | |
| Structured summary | 2 | Provide a structured summary including background, objectives, eligibility criteria, sources of evidence, charting methods, results, and conclusions. | Page 2 |
| **INTRODUCTION** | | | |
| Rationale | 3 | Describe the rationale for the review and explain why a scoping review approach was used. | Pages 4–5 |
| Objectives | 4 | Provide an explicit statement of the questions and objectives (PCC: Population, Concept, Context). | Page 5 |
| **METHODS** | | | |
| Protocol and registration | 5 | Indicate whether a review protocol exists and provide registration information. | Page 5 (Stated as not registered) |
| Eligibility criteria | 6 | Specify characteristics of the sources of evidence used as eligibility criteria and provide a rationale. | Pages 6–7 |
| Information sources | 7 | Describe all information sources in the search (databases and dates of coverage). | Pages 5–6 |
| Search | 8 | Present the full electronic search strategy for at least one database. | Page 6 |
| Selection of sources | 9 | State the process for selecting sources of evidence (screening and eligibility). | Page 7 |
| Data charting process | 10 | Describe the methods of charting data (use of calibrated/tested forms and independent charting). | Page 7 |
| Data items | 11 | List and define all variables for which data were sought. | Pages 7–8 |
| Critical appraisal | 12 | Provide a rationale if a critical appraisal was done (or why not). | Page 8 (Stated as not done) |
| Synthesis of results | 13 | Describe the methods of handling and summarizing the charted data. | Page 8 |
| **RESULTS** | | | |
| Selection of sources | 14 | Give the number of sources screened, assessed for eligibility, and included with a flow diagram. | Page 8 |
| Characteristics | 15 | Present characteristics for each source of evidence and provide citations. | Pages 9–10 & Table 1 (Pages 20–24) |
| Critical appraisal | 16 | Present data on critical appraisal (if conducted). | Page 8 (Stated as not done) |
| Results of individual sources | 17 | For each source, present relevant data charted that relate to the review questions. | Table 1 (Pages 20–24) |
| Synthesis of results | 18 | Summarize/present the charting results as they relate to the objectives. | Pages 10–14 |
| **DISCUSSION** | | | |
| Summary of evidence | 19 | Summarize main results and relevance to key groups. | Pages 14–19 |
| Limitations | 20 | Discuss the limitations of the scoping review process. | Pages 19–20 |
| Conclusions | 21 | Provide a general interpretation of the results and potential implications. | Page 20 |
| **FUNDING** | | | |
| Funding | 22 | Describe sources of funding for the scoping review. | Page 20 (Stated as no external funding) |
